# Supplementary material for: Topical Application of Autologous Leukocyte-Rich Platelet-Rich Plasma with a High Concentration of Monocytes in Patients with Recalcitrant Ischemic Diabetic Foot Ulcers: Efficacy, Safety and Economic Evaluation.
Source: Preprints.org preprint supplement (doi:10.20944/preprints202312.1523.v1), 2023-12-20
Supplement: Supplementary file 1 [file supplementary]

**SUPPLEMENTARY MATERIALS**

**Table 1S –** Costs (EUR) for hospital admission for foot-related conditions.

| **DRG code and description of procedure** | **Hospital length >1 day** | **Day-hospital** |
| --- | --- | --- |
| 114 – Toe amputation for vascular diseases | 8,962 | 731 |
| 205 – Lower limb amputation for metabolic or endocrinological disease vascular diseases | 13,431 | 482 |
| 130 – Peripheral revascularization with multiple comorbid conditions | 4,904 | 390 |
| 131 – Peripheral revascularization without multiple comorbid conditions | 3,398 | 390 |
| 556 – Peripheral revascularization with drug-eluting stent | 10,097 | 731 |
| 418 - Post-surgical infection | 3,862 | 453 |
| 238 – Osteomyelitis | 5,974 | 379 |
| 575 or 576 – Sepsis | 6,974 | 453 |

§ Hospital length without any additional costs; *additional daily costs for hospitalization > length threshold

**Table 2S –** Costs (EUR) associated to procedures and laboratory examinations.

| **DRG code and description of procedures** | **Costs** (€) |
| --- | --- |
| 88.28 Foot/ankle X-ray | 21 |
| 88.38.7 Foot/ankle computed tomography | 173 |
| 88.77.2 Lower limbs ecocholor doppler | 49.5 |
| 88.94.1 Foot/ankle Nuclear Magnetic Resonance | 254 |
| 89.65.4 Transcutaneous oxygen monitoring | 18.6 |
| 90.16.3 Creatinine | 1.2 |
| 90.28.1 Glycated Hemoglobin | 10.6 |
| 90.27.1 Glycemia | 1.30 |
| 90.14.3 Total cholesterol | 1.1 |
| 90.14.1 HDL cholesterol | 1.8 |
| 90.43.2 Triglycerides | 1.3 |
| 90.72.3 C-reactive protein | 3.6 |
| 86.11 Cutaneous biopsy | 13.9 |
| 90.85.2 Swab with antibiogram | 12.2 |
| 99.24.2 Antibiotic infusion (cost for antibioitics not included) | 3.1 |
